# Supplementary material for: Promoted Hole Transport Capability by Improving Lateral Current Spreading for High‐Efficiency Quantum Dot Light‐Emitting Diodes
Source: PubMed Central journal article supplement (PMC7709982; doi:10.1002/advs.202001760), 2020-11-01
Supplement: ADVS-7-2001760-s001.pdf [file ADVS-7-2001760-s001.pdf]

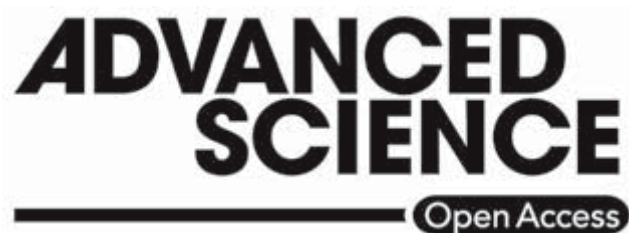

## Supporting Information

for *Adv. Sci.*, DOI: 10.1002/adv.202001760

Promoted Hole Transport Capability by Improving Lateral Current Spreading for High-efficiency Quantum Dot Light-Emitting Diodes

*Qianqian Wu, Fan Cao, Haoran Wang, Jianquan Kou, Zi-Hui Zhang,\* and Xuyong Yang\**

## Supporting Information

### **Promoted Hole Transport Capability by Improving Lateral Current Spreading for High-efficiency Quantum Dot Light-Emitting Diodes**

*Qianqian Wu, Fan Cao, Haoran Wang, Jianquan Kou, Zi-Hui Zhang,\* and Xuyong Yang\**

Q. Wu, F. Cao, H. Wang, Prof. X. Yang

Key Laboratory of Advanced Display and System Applications of Ministry of Education, Shanghai University, 149 Yanchang Road, Shanghai 200072, China

E-mail: [yangxy@shu.edu.cn](mailto:yangxy@shu.edu.cn)

J. Kou, Prof. Z.-H. Zhang

State Key Laboratory of Reliability and Intelligence of Electrical Equipment, Hebei University of Technology, 5340 Xiping Road, Beichen District, Tianjin 300401, China

E-mail: [zh.zhang@hebut.edu.cn](mailto:zh.zhang@hebut.edu.cn)

**SI-1. Histogram of peak EQEs measured from 30 devices of Device A, B and D.**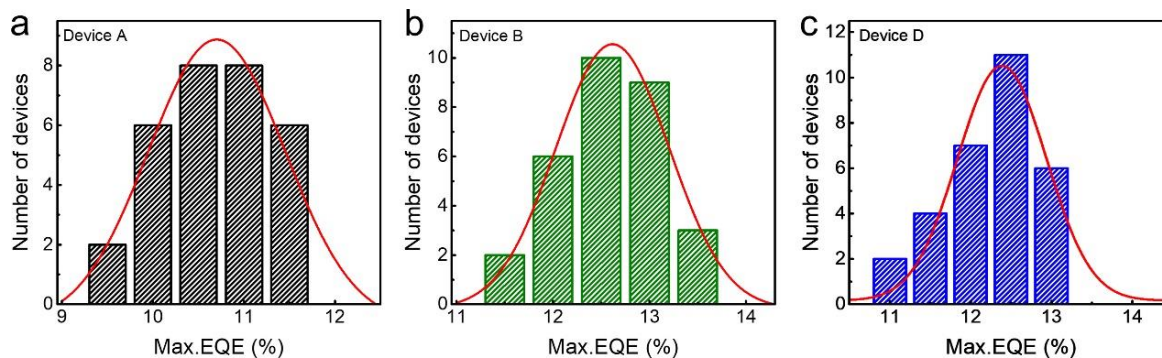

**Figure S1.** EQE reproducibility of (a) Device A, (b) Device B and (c) Device D. The average peak EQE of Device A, B and D are 10.9%, 12.8% and 12.4%, respectively, and the relative standard deviations of Device A, B and D are 5.08%, 4.28% and 3.49%, respectively, showing good performance reproducibility.

**SI-2. Average EQE and error range curve of devices A-D.**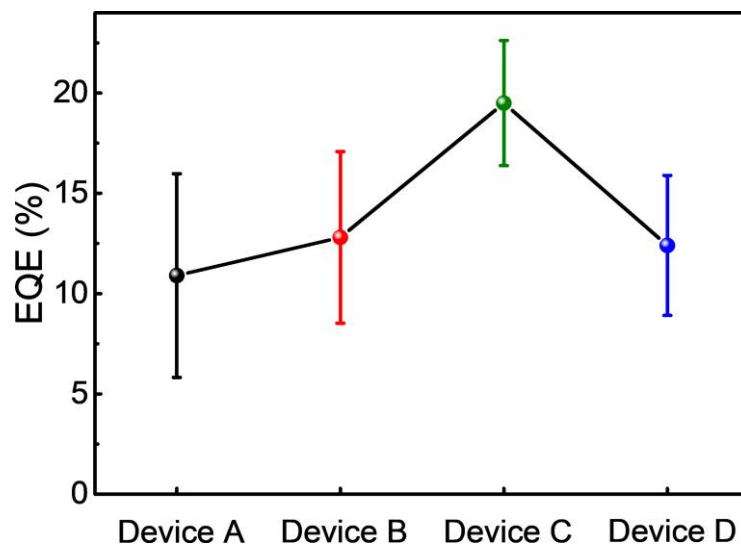

**Figure S2.** The average EQE and error range curve of devices A-D.

SI-3. *J-V-L* and *CE-L-EQE* characteristics of devices.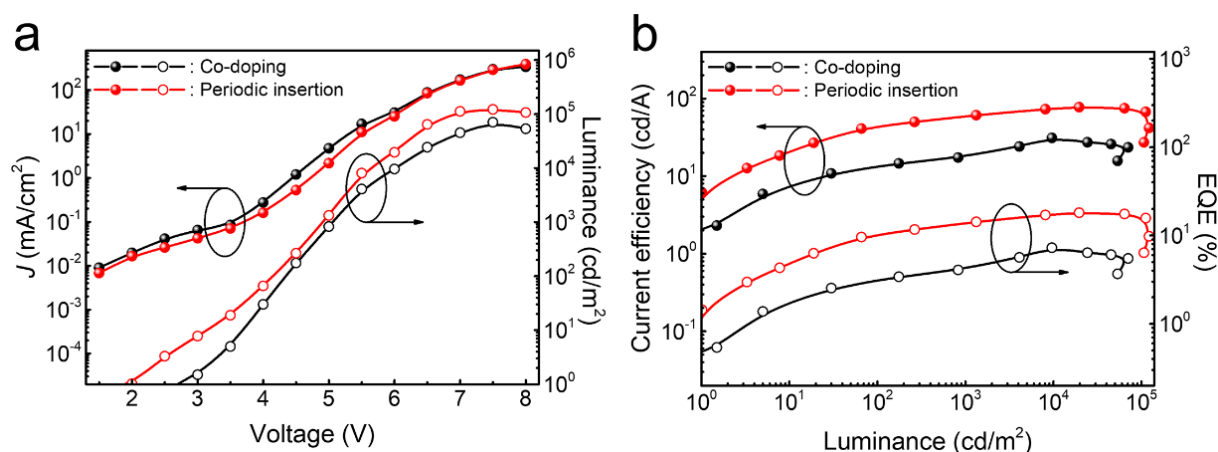

**Figure S3.** a) *J-V-L*, b) *CE-L-EQE* curves of the devices with HTLs structure of CBP:3.8 vol.% MoO<sub>3</sub> and CBP (16.7 nm)/MoO<sub>3</sub> (1 nm)/CBP (16.7 nm)/MoO<sub>3</sub> (1 nm)/CBP (16.7 nm).

## SI-4. Energy band diagrams for devices at the equilibrium state.

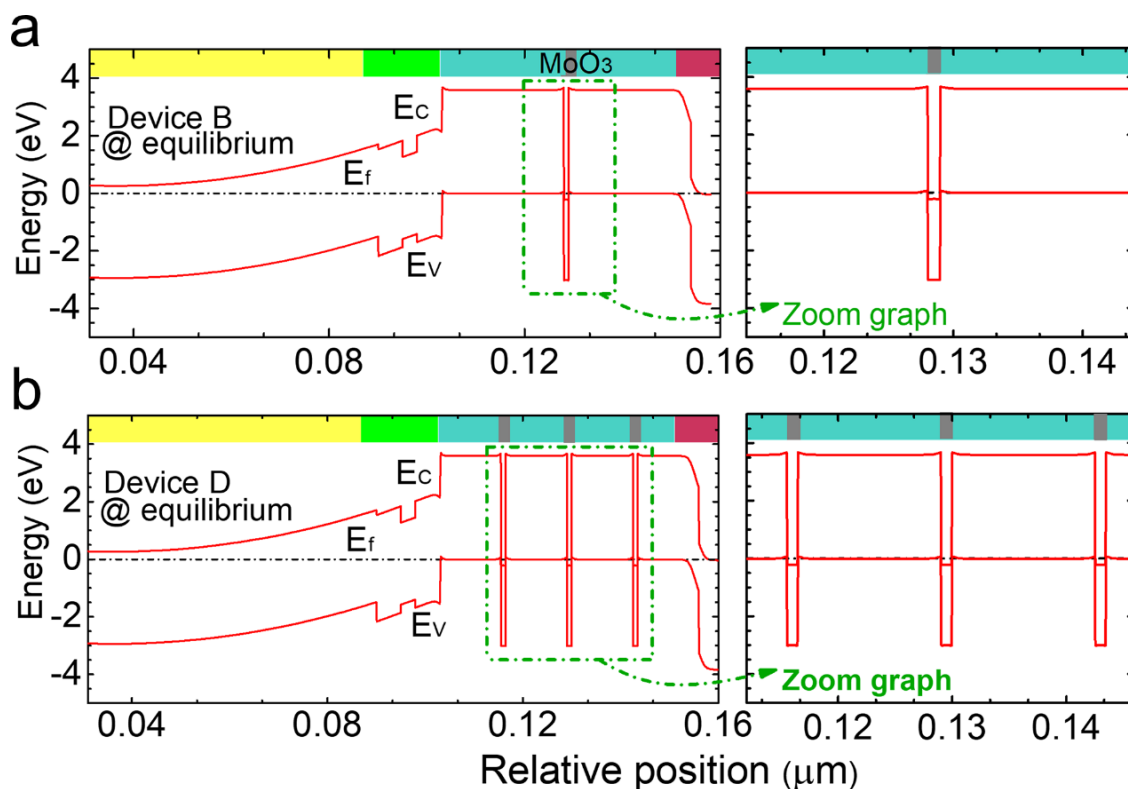

**Figure S4.** Energy band diagrams for a) Device B and b) Device D at the equilibrium state, respectively.  $E_c$ ,  $E_v$  and  $E_f$  denote the conduction band, the valence band and quasi-Fermi level, respectively.

SI-5. AFM images of CBP films with/without periodic MoO<sub>3</sub> thin layer.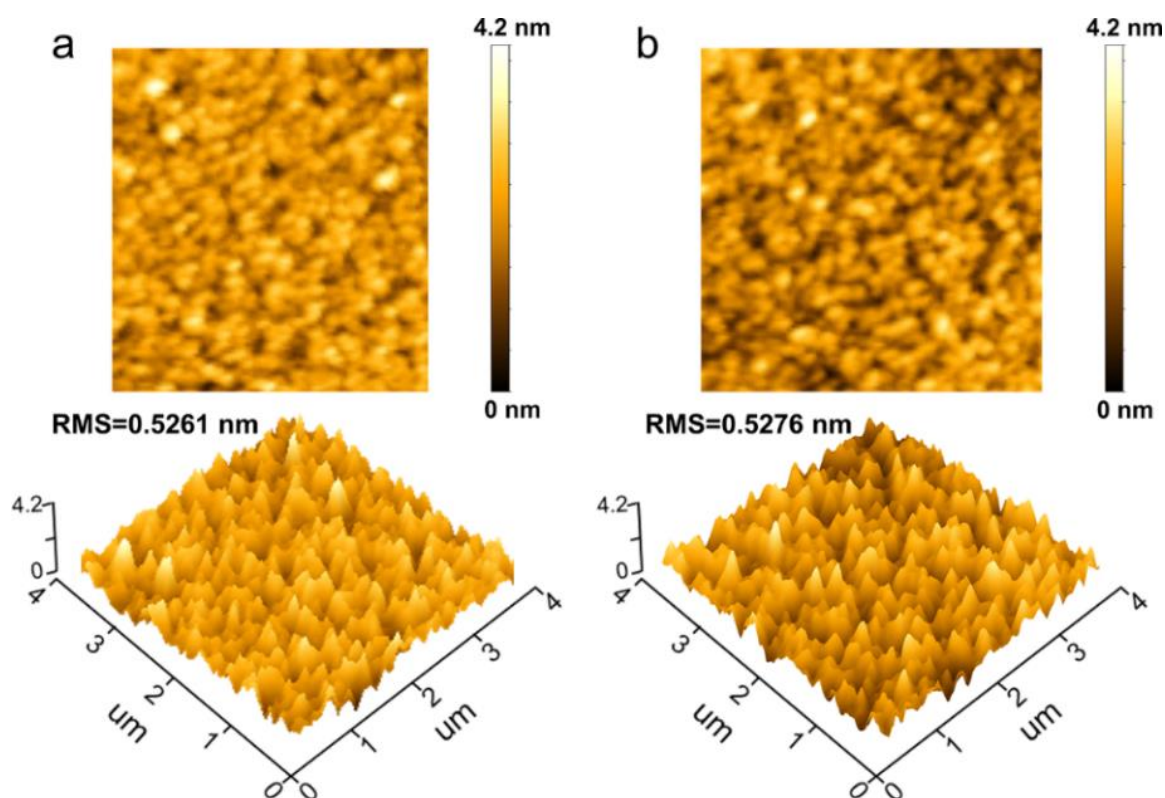

**Figure S5.** Surface morphology of a) the CBP film and b) CBP film with two periodic MoO<sub>3</sub> thin layer.

**Table S1.** Carrier mobility and carrier concentration parameters used in the simulations.

| Electrical parameter                                                    | ITO<br>(Ref)            | ZnO<br>(Ref)                | CBP<br>(Ref)                | MoO <sub>3</sub><br>(Ref)  | HTL<br>(Ref)                |
|-------------------------------------------------------------------------|-------------------------|-----------------------------|-----------------------------|----------------------------|-----------------------------|
| Hole mobility<br>[cm <sup>2</sup> V <sup>-1</sup> s <sup>-1</sup> ]     | -                       | -                           | 3.8×10 <sup>-4</sup><br>[4] | 1.6×10 <sup>2</sup><br>[5] | -                           |
| Electron mobility<br>[cm <sup>2</sup> V <sup>-1</sup> s <sup>-1</sup> ] | 10 <sup>2</sup><br>[1]  | 1.8×10 <sup>-3</sup><br>[2] | -                           | -                          | 3.3×10 <sup>-2</sup><br>[6] |
| Carrier concentration<br>[cm <sup>-3</sup> ]                            | 10 <sup>20</sup><br>[1] | 10 <sup>18</sup><br>[3]     | 10 <sup>1</sup><br>[4]      | 10 <sup>19</sup><br>[5]    | 10 <sup>19</sup><br>[7]     |

### References

- [1] Z. Chen, Y. Zhuo, W. Tu, Z. Li, X. Ma, Y. Pei, G. Wang, *Opt. Express* **2018**, *26*, 22123.
- [2] X. Dai, Z. Zhang, Y. Jin, Y. Niu, H. Cao, X. Liang, L. Chen, J. Wang, X. Peng, *Nature* **2014**, *515*, 96.
- [3] J. H. Kim, E. M. Kim, D. Andeen, D. Thomson, S. P. DenBaars, F. F. Lange, *Adv. Funct. Mater.* **2007**, *17*, 463.

- [4] J. C. Bolinger, L. Fradkin, K.-J. Lee, R. E. Palacios, P. F. Barbara, *P. Natl. Acad. Sci. USA* **2009**, *106*, 1342.
- [5] M. Kovendhan, D. P. Joseph, P. Manimuthu, S. Sambasivam, S. N. Karthick, K. Vijayarangamuthu, A. Sendilkumar, K. Asokan, H. J. Kim, B. C. Choi, C. Venkateswaran, R. Mohan, *Appl. Surf. Sci.* 2013, *284*, 624.
- [6] W. S. Jeon, J. S. Park, L. Li, D. C. Lim, Y. H. Son, M. C. Suh, J. H. Kwon, *Org. Electron.* **2012**, *13*, 939.
- [7] S. Lee, J.-H. Lee, K. H. Kim, S.-J. Yoo, T. G. Kim, J. W. Kim, J.-J. Kim, *Org. Electron.* **2012**, *13*, 2346.
